# Supplementary material
Source: PubMed Central journal article supplement (PMC4222533)
Supplement: bi500680s_si_001.pdf [file bi500680s_si_001.pdf]

## Supplementary Materials

**Table S1. Integrin/Skelemin tertiary complex: data used for docking.**

|                                                                           | Sk45 <sup>b</sup>                                           | $\beta_3$ <sup>c</sup>           | $\alpha_{IIb}$ <sup>d</sup>                              |
|---------------------------------------------------------------------------|-------------------------------------------------------------|----------------------------------|----------------------------------------------------------|
| Active Residues <sup>a</sup> used in HADDOCK to define binary interfaces. | E1368<br>H1370<br>V1372<br>Y1374<br>V1382<br>D1383<br>I1411 | K716*<br>H722*<br>R724*<br>K725* |                                                          |
|                                                                           | K1361<br>A1363<br>T1394                                     |                                  | V990*<br>F992*<br>F993<br>K994<br>R995*<br>N996<br>R997* |

- a) Active residues are chosen based upon chemical shifts perturbation data. For Sk45, data is acquired in this study. For integrin subunits, our previously published data (1) is used. Integrin residues, shown to be involved in in complex with skelemin by mutagenesis studies (2, 3), are marked by star (\*).
- b) The fold of tandem Ig domains 4 and 5 is determined as described in Structure Calculations (PDB ID: 4V10). The ensemble representative with the lowest energy is used for docking.
- c)  $\beta_3$  conformer from its binary complex with  $\alpha_{IIb}$  (PDB ID 1M80) is used for docking.
- d)  $\alpha_{IIb}$  conformer, used for docking, is calculated in this study based upon trNOEs reported previously (1). These data resulted in total of 207 distance restraints (142 unambiguous and 65 ambiguous).

**Figure S1.**

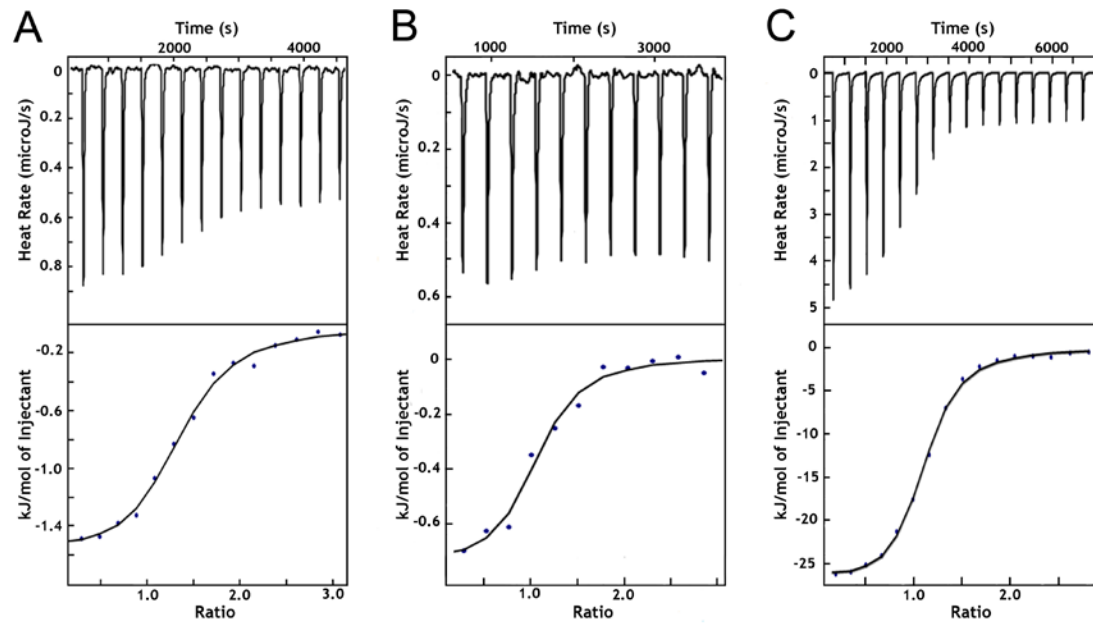

**Figure S1.** Thermograms and binding curves. **A:** C-terminal  $\beta_3$  and Sk4, **B:**  $\alpha_{IIb}$  and Sk45, and **C:**  $\alpha_{IIb}$  and  $\beta_3$ . Note that N-terminal  $\beta_3$  and Sk45 binding data is not shown as it contained high amounts of noise. The titration of  $\beta_3$  with  $\alpha_{IIb}$  is shown to compare the binding between the integrin subunits and integrin to skelemin.  $K_d$  of  $\alpha_{IIb}$  and  $\beta_3$  interaction appears to be  $5.7 \pm 0.7 \mu\text{M}$ .

**Figure S2.**

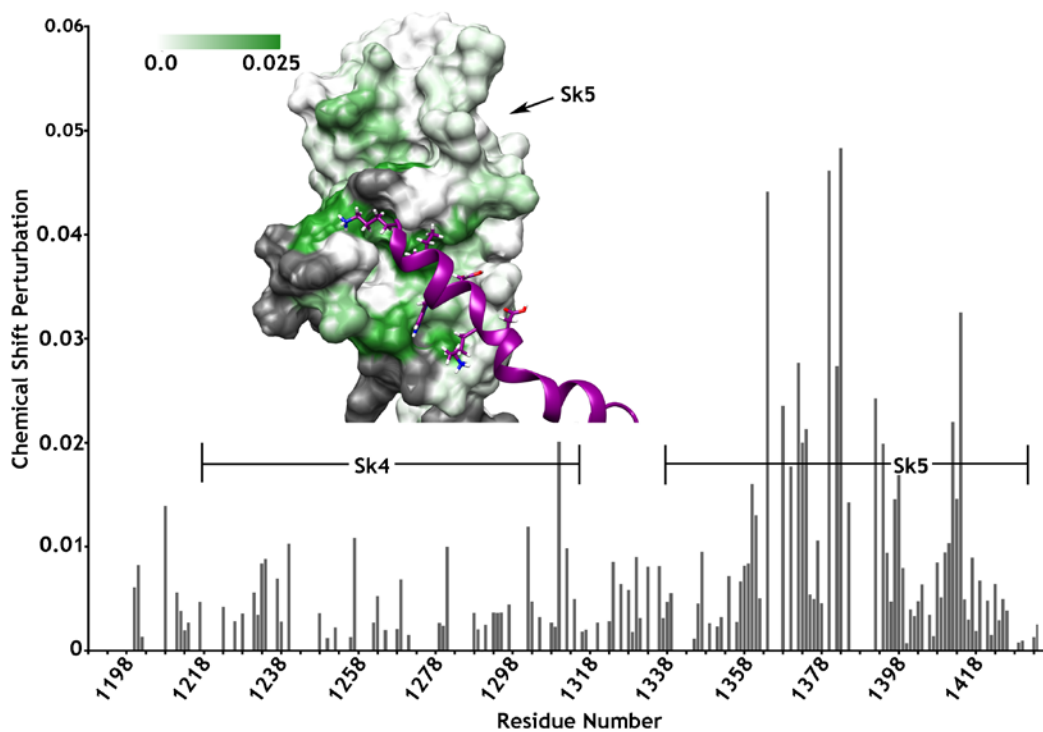

**Figure S2.** The chemical shift perturbations of Sk45 titrated with N-terminal  $\beta_3$  peptide (at 1:3 ratio) is presented. The residues belonging to Sk4 or Sk5 are marked on the graph. The structure displayed in inset is of Sk5 with bound  $\beta_3$  (purple). The surface of Sk5 is colored based on the magnitude of the chemical shift perturbation (according to the shown scale). The residues with no data available are colored gray.
